# Supplementary material for: A model of k-mer surprisal to quantify local sequence information content surrounding splice regions
Source: PeerJ journal article supplement (doi:10.7717/peerj.10063), 2020-11-04

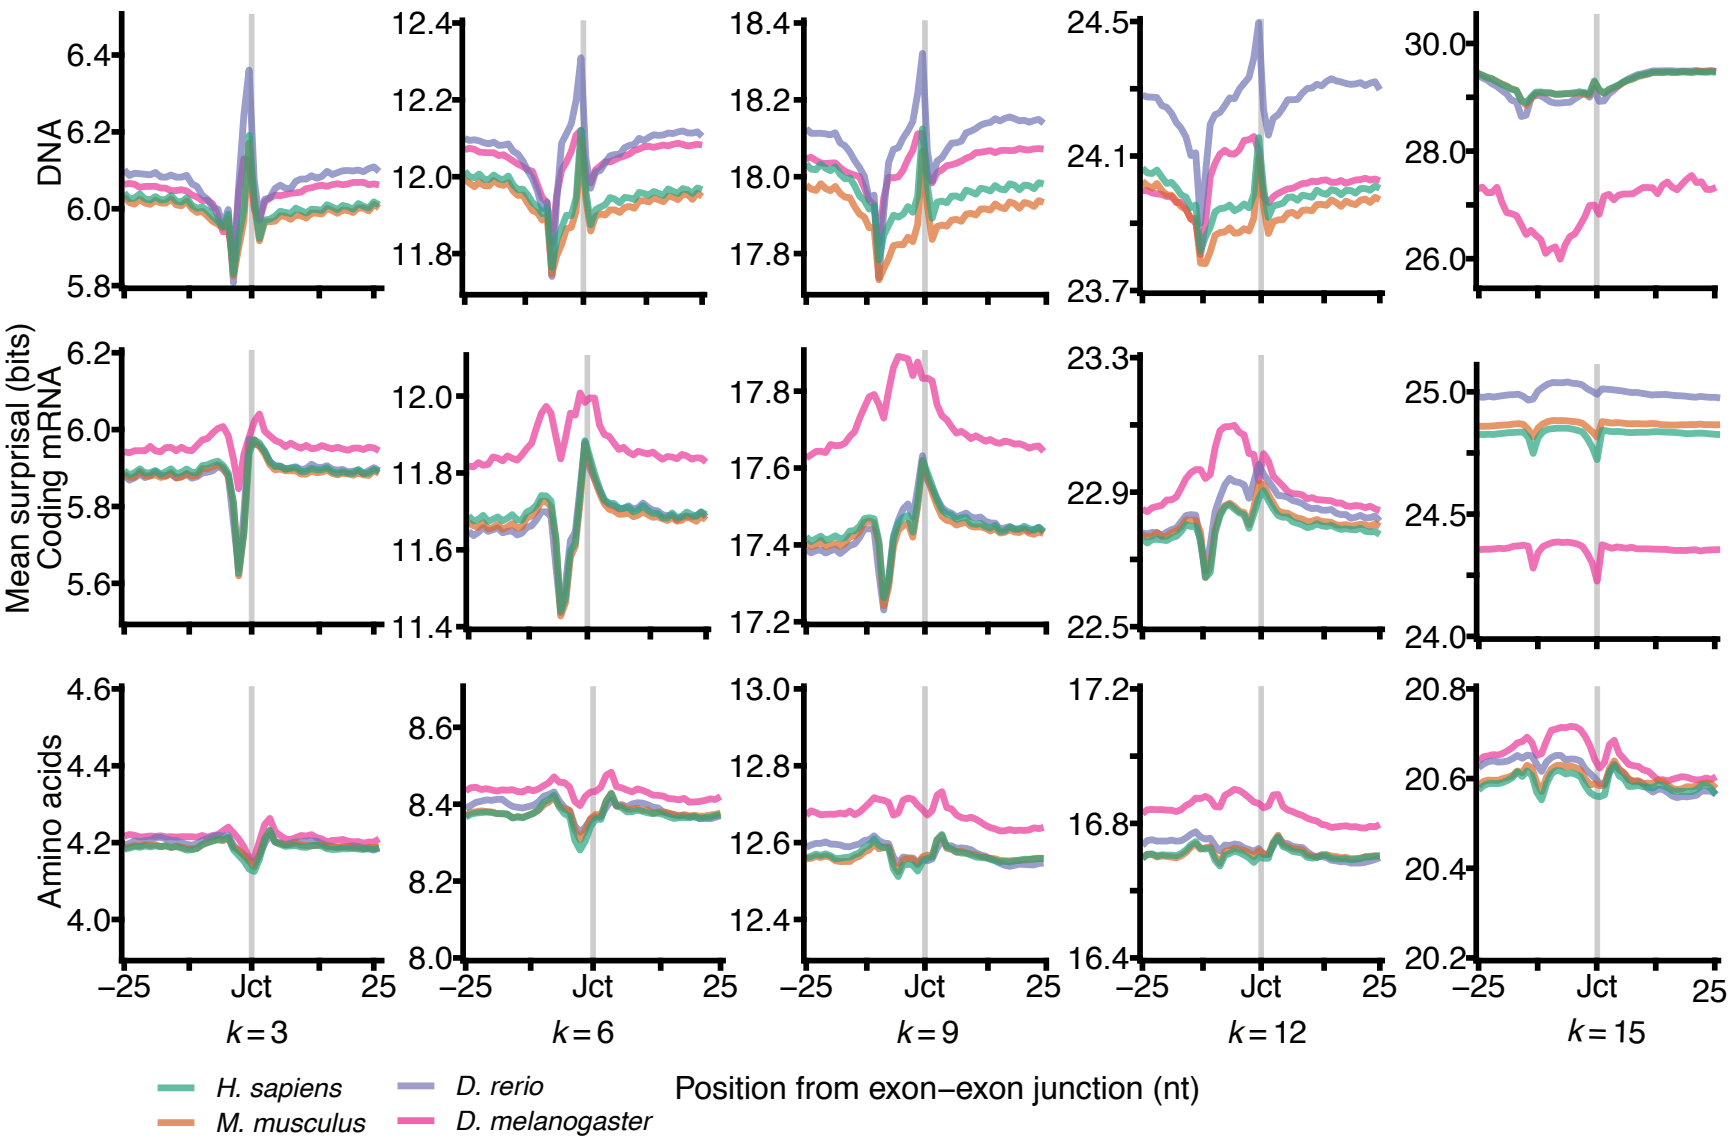

Supplement: FigureS3.pdf [file FigureS3.pdf]
